# Supplementary material for: Particle size effect of SiO2-supported ZnO catalysts in propane dehydrogenation
Source: Royal Society of Chemistry journal article supplement (doi:10.1039/d2cy02131e), 2023-01-01
Supplement: d2cy02131e1.pdf [file d2cy02131e1.pdf]

## Supporting information

### Particle size effect of SiO<sub>2</sub>-supported ZnO catalysts in propane dehydrogenation

Xianxian Shi,<sup>a</sup> Si Chen,<sup>b</sup> Shang Li,<sup>b</sup> Yuqi Yang,<sup>c</sup> Qiaoqiao guan,<sup>b</sup> Jiani Ding,<sup>b</sup> Xinyu Liu,<sup>b</sup> Qin Liu,<sup>b</sup> Wenlong Xu,<sup>b</sup> and Junling Lu<sup>\*ab</sup>

<sup>a</sup>Hefei National Research center for Physical Sciences at the Microscale, University of Science and Technology of China, Hefei, Anhui 230026, China

<sup>b</sup>School of Chemistry and Materials Science, Key Laboratory of Surface and Interface Chemistry and Energy Catalysis of Anhui Higher Education Institutes, University of Science and Technology of China, Hefei, Anhui, 230026, China

<sup>c</sup>Human Institute, ShanghaiTech Universty, Shanghai 201210, China

\*Corresponding author E-mail: [junling@ustc.edu.cn](mailto:junling@ustc.edu.cn)

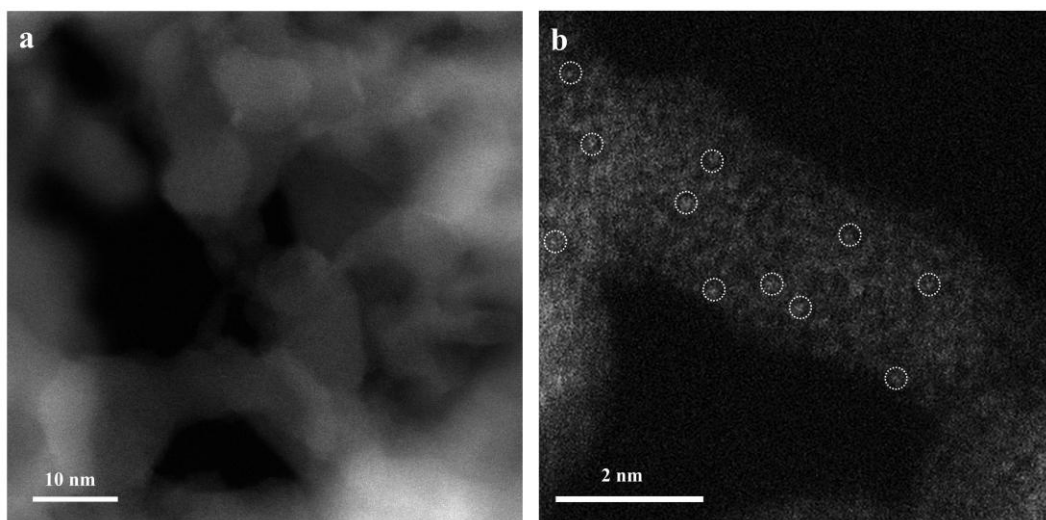

**Figure S1.** Representative HAADF-STEM images of 1ZnO/SiO<sub>2</sub> at low and high magnifications.

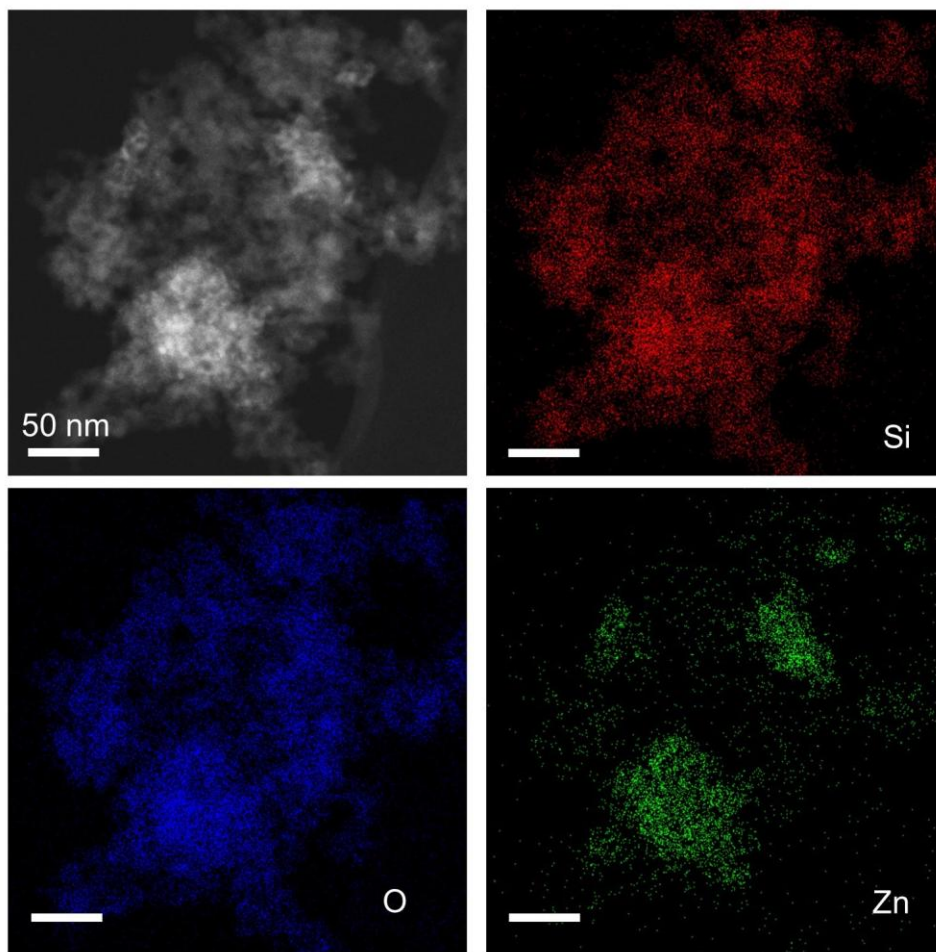

**Figure S2.** (a) A representative HAADF-STEM image of 7ZnO/SiO<sub>2</sub> and the corresponding EDS mapping of (b) Si K $\alpha_1$ , (c) O K $\alpha_1$ , and (d) Zn K $\alpha_1$ .

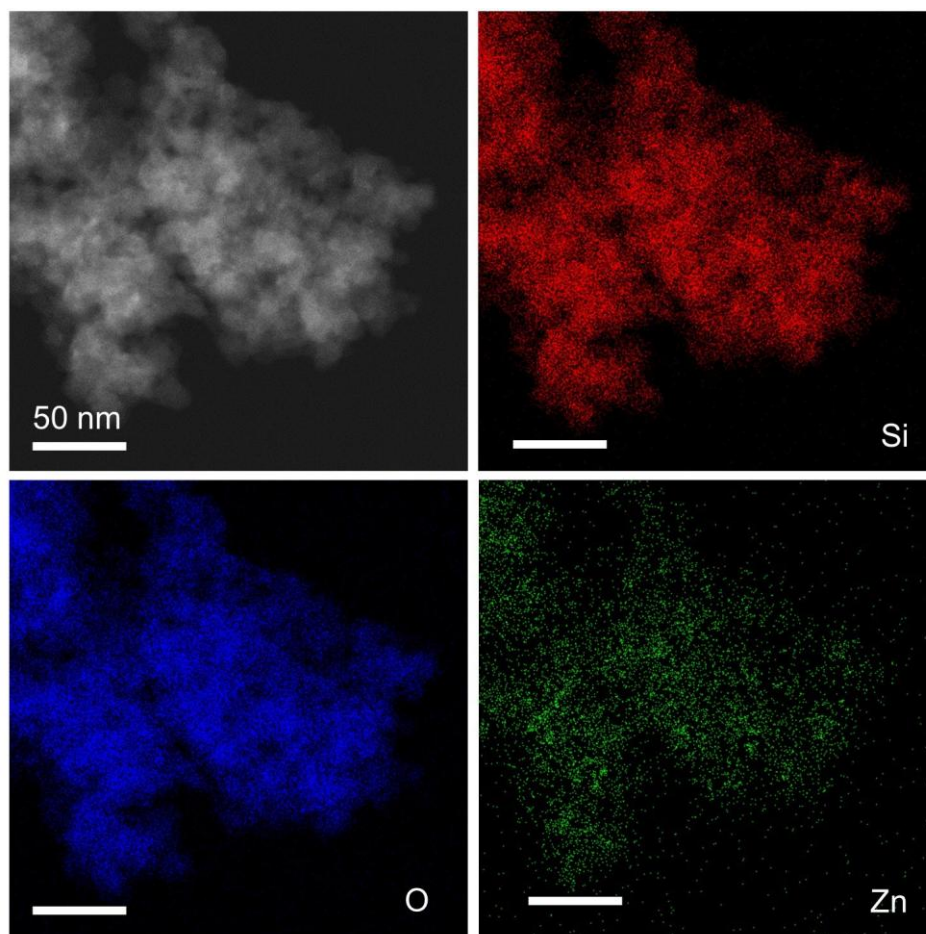

**Figure S3.** (a) A representative HAADF-STEM image of 10ZnO/SiO<sub>2</sub> and the corresponding EDS mapping of (b) Si K $\alpha_1$ , (c) O K $\alpha_1$ , and (d) Zn K $\alpha_1$ .

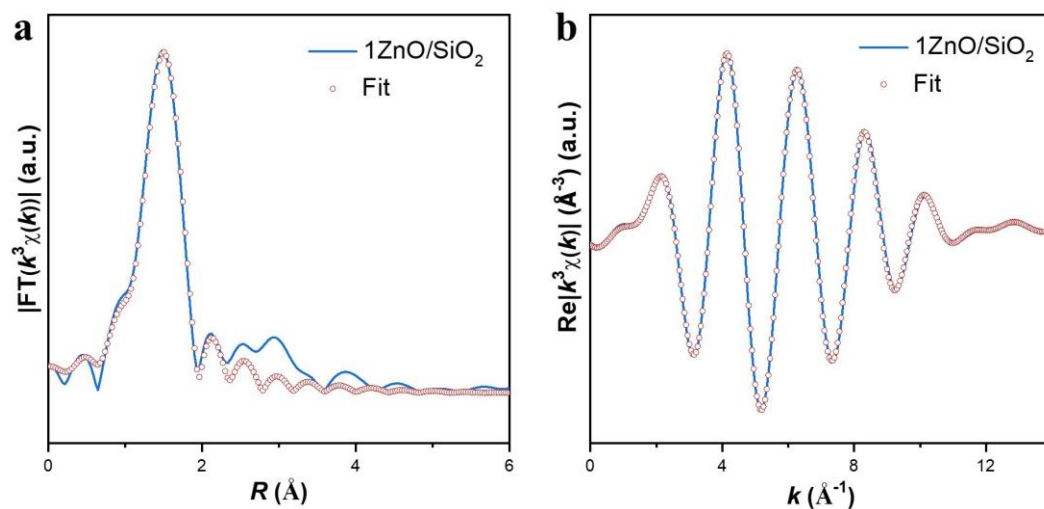

**Figure S4.** (a) The  $k^3$ -weighted Fourier transform spectrum and (b) the inversely Fourier transforms (FT)  $K$ -space EXAFS spectrum of the 1ZnO/SiO<sub>2</sub> sample after *ex situ* H<sub>2</sub> reduction at 600 °C. Least-squares EXAFS fittings in (a) and (b) are also shown in red dot lines.

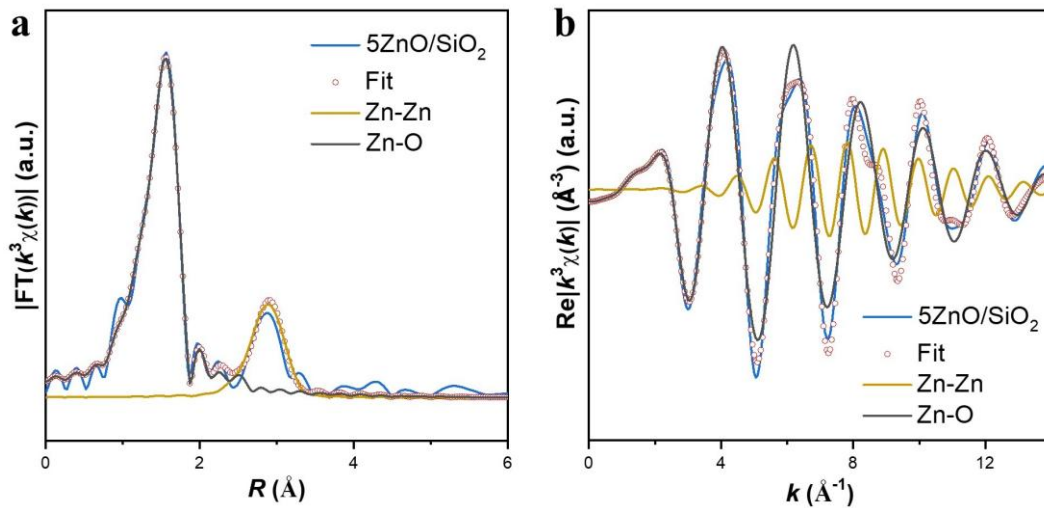

**Figure S5.** (a) The  $k^3$ -weighted Fourier transform spectrum and (b) the inversely FT  $K$ -space EXAFS spectrum of the 5ZnO/SiO<sub>2</sub> sample after *ex situ* H<sub>2</sub> reduction at 600 °C. Least-squares EXAFS fittings in (a) and (b) are also shown in red dot lines.

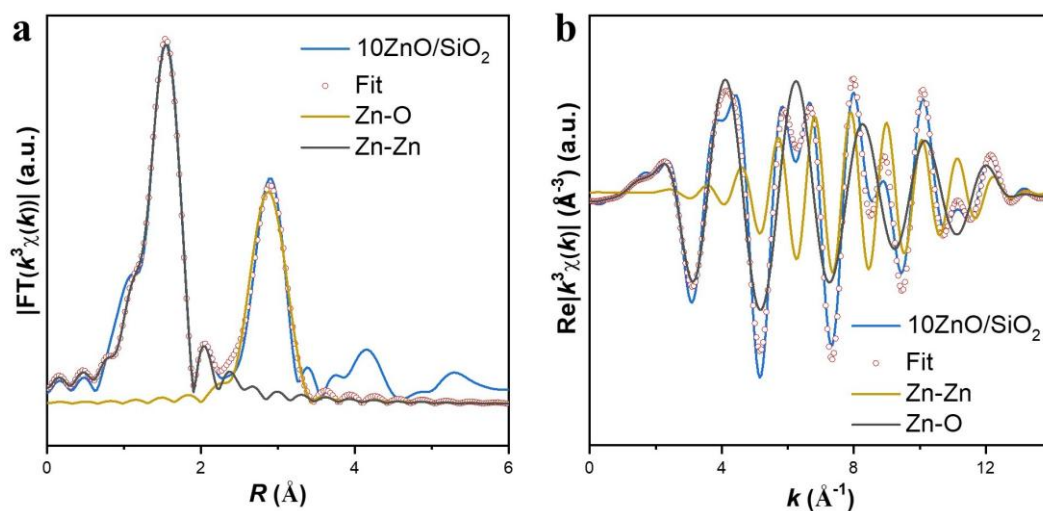

**Figure S6.** (a) The  $k^3$ -weighted Fourier transform spectrum and (b) the inversely FT  $K$ -space EXAFS spectrum of the 10ZnO/SiO<sub>2</sub> sample after *ex situ* H<sub>2</sub> reduction at 600 °C. Least-squares EXAFS fittings in (a) and (b) are also shown in red dot lines.

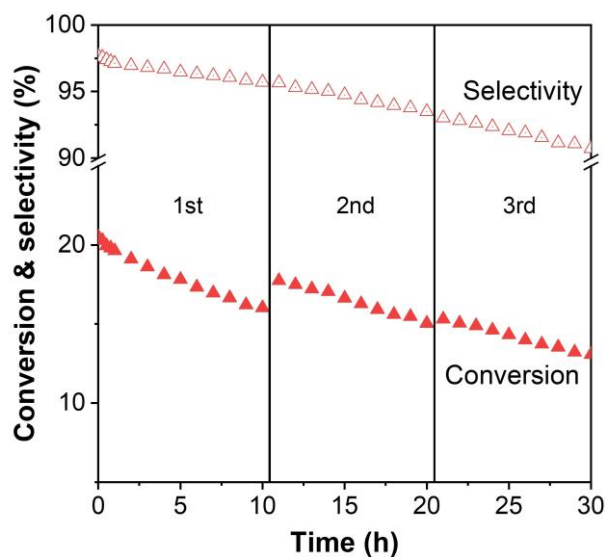

**Figure S7.** Stability test of the 5ZnO/SiO<sub>2</sub> catalyst in PDH at 550 °C for three successive dehydrogenation cycles with catalyst regeneration in between. Catalyst regeneration was performed by a treatment 10% O<sub>2</sub> in Ar for 0.5 h and a reduction 10% H<sub>2</sub> in Ar for 0.5 h at 550 °C. Reaction condition: 10% propane, 10% H<sub>2</sub> balanced in Ar; flow rate = 20 mL min<sup>-1</sup>; pressure = 0.1 MPa.



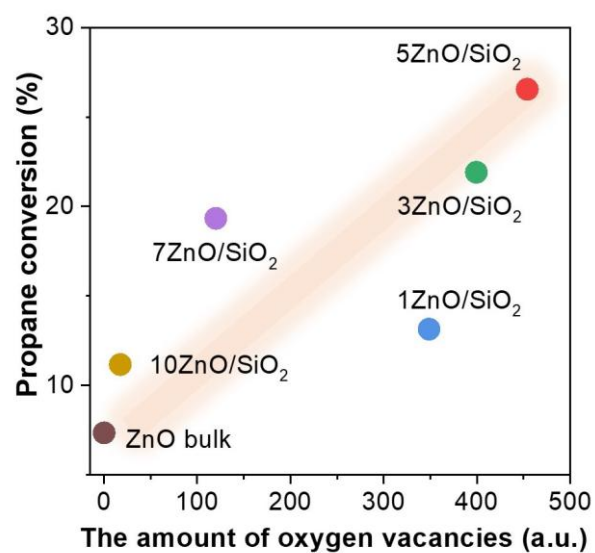

**Figure S8.** The correlation between the conversion of propane at 600 °C and the amount of oxygen vacancies determined by normalized PL spectra based on the Zn content.

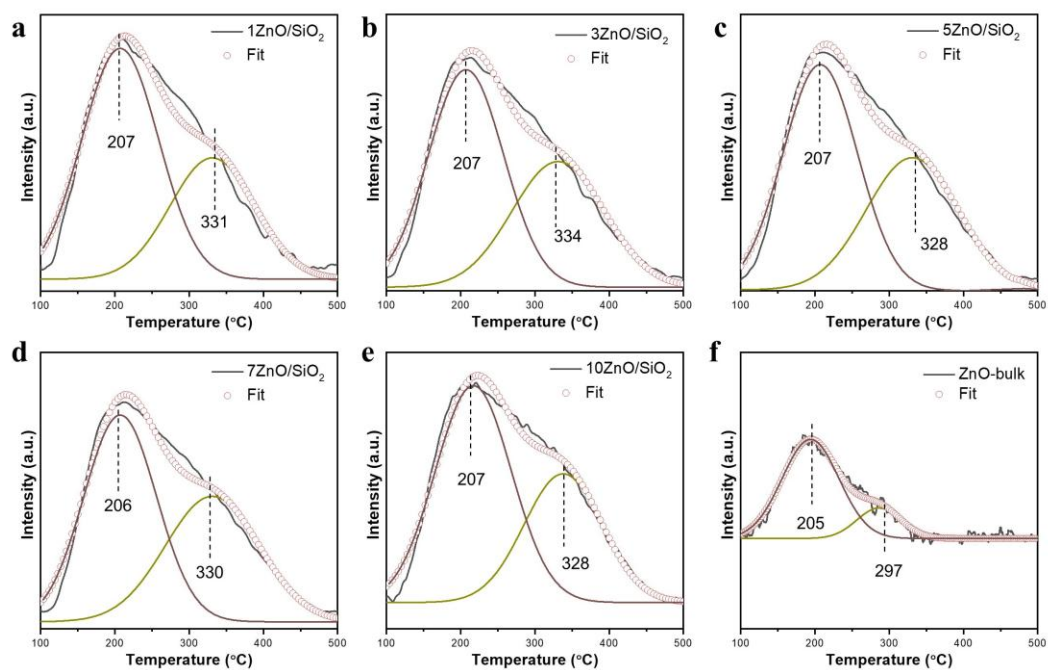

**Figure S9.** The  $\text{NH}_3$ -TPD spectra and fittings profiles of ZnO catalysts with different ZnO sizes. (a)  $1\text{ZnO}/\text{SiO}_2$ , (b)  $3\text{ZnO}/\text{SiO}_2$ , (c)  $5\text{ZnO}/\text{SiO}_2$ , (d)  $7\text{ZnO}/\text{SiO}_2$ , (e)  $10\text{ZnO}/\text{SiO}_2$ , and (f) ZnO-bulk.

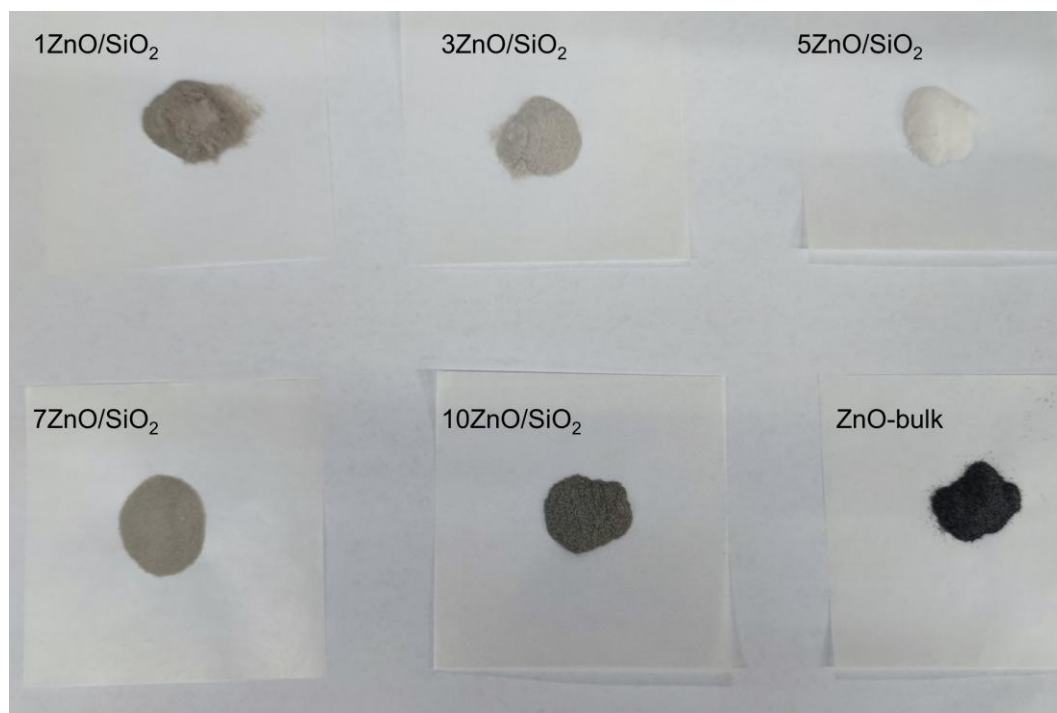

**Figure S10.** Pictures of used catalysts after 10 h stability test. The different colors indicated the different extent of coke accumulations after the stability test.

**Table S1.** The EXAFS fitting results of  $x\text{ZnO}/\text{SiO}_2$  catalysts.

| Sample                 | Path  | CNs <sup>a</sup> | R(Å) <sup>b</sup> | $\sigma^2(10^{-3}\text{Å}^2)$ <sup>c</sup> | $\Delta E_0(\text{eV})$ <sup>d</sup> |
|------------------------|-------|------------------|-------------------|--------------------------------------------|--------------------------------------|
| Zn foil                | Zn-Zn | 6                | 2.65              |                                            |                                      |
| ZnO                    | Zn-O  | 4                | 1.97              |                                            |                                      |
|                        | Zn-Zn | 12               | 3.21              |                                            |                                      |
| 1ZnO/SiO <sub>2</sub>  | Zn-O  | 3.6±0.3          | 1.95±0.01         | 5.9±1.4                                    | 3.3±0.9                              |
|                        | Zn-O  | 3.7±0.2          | 1.96±0.01         | 6.0±1.0                                    | 1.9±0.7                              |
| 5ZnO/SiO <sub>2</sub>  | Zn-Zn | 2.1±0.5          | 3.23±0.03         | 9.9±0.8                                    | 4.4±2.1                              |
|                        | Zn-O  | 3.8±0.6          | 1.96±0.01         | 5.5±1.7                                    | 3.8±1.7                              |
| 10ZnO/SiO <sub>2</sub> | Zn-Zn | 5.3±0.8          | 3.22±0.02         | 11.3±1.5                                   | 6.7±2.1                              |

<sup>a</sup>CN is the coordination number for the absorber–backscatterer pair; <sup>b</sup>R is the average absorber–backscatterer distance; <sup>c</sup> $\sigma^2$  is the Debye–Waller factor; <sup>d</sup> $\Delta E_0$  is the inner potential correction.

**Table S1.** Comparison of representative catalysts for catalyzing propane to propylene.

| Sample                                             | Temp.<br>( °C) | Components (vol. %)                                                          | WHSV<br>(h <sup>-1</sup> ) | STY (C <sub>3</sub> H <sub>6</sub> )<br>g(C <sub>3</sub> H <sub>6</sub> ) h <sup>-1</sup> g <sup>-1</sup> | k <sub>d</sub><br>(h <sup>-1</sup> ) | Ref.      |
|----------------------------------------------------|----------------|------------------------------------------------------------------------------|----------------------------|-----------------------------------------------------------------------------------------------------------|--------------------------------------|-----------|
| 5ZnO/SiO <sub>2</sub>                              | 600            | C <sub>3</sub> H <sub>8</sub> /H <sub>2</sub> /Ar = 1 : 1 : 8                | 2.4                        | <b>0.58</b>                                                                                               | 0.030                                | This work |
|                                                    | 550            |                                                                              |                            | <b>0.41</b>                                                                                               |                                      |           |
| Zn/Al <sub>2</sub> O <sub>3</sub>                  | 600            | C <sub>3</sub> H <sub>8</sub> /H <sub>2</sub> /N <sub>2</sub> = 28 : 28 : 44 | 3.0                        | 0.80                                                                                                      | 0.178                                | 1         |
| 4Zn/TiZrO <sub>x</sub>                             | 550            | C <sub>3</sub> H <sub>8</sub> /H <sub>2</sub> /N <sub>2</sub> = 40 : 5 : 55  | 4.7                        | 1.28                                                                                                      | 0.539                                | 2         |
| Znβ-10                                             | 600            | C <sub>3</sub> H <sub>8</sub> /N <sub>2</sub> = 5 : 95                       | 0.4                        | 0.18                                                                                                      | 0.088                                | 3         |
| 50Zn/Al <sub>2</sub> O <sub>3</sub>                | 600            | C <sub>3</sub> H <sub>8</sub> /N <sub>2</sub> = 1 : 9                        | 2.5                        | 0.38                                                                                                      | 0.408                                | 4         |
| 10%Zn/250HZSM-5                                    | 600            | C <sub>3</sub> H <sub>8</sub> /N <sub>2</sub> = 5 : 95                       | 0.6                        | 0.36                                                                                                      | 0.055                                | 5         |
| ZnO and ZnO-S-1_3                                  | 550            | C <sub>3</sub> H <sub>8</sub> /H <sub>2</sub> /N <sub>2</sub> = 4 : 2 : 4    | 3.1                        | 1.11                                                                                                      | 0.026                                | 6         |
| Zn <sub>1.5</sub> Ti <sub>1</sub> Al <sub>2</sub>  | 500            | C <sub>3</sub> H <sub>8</sub> /N <sub>2</sub> = 5 : 95                       | 2.9                        | 0.73                                                                                                      | 0.184                                | 7         |
| Cr/Al <sub>2</sub> O <sub>3</sub> -700             | 580            | C <sub>3</sub> H <sub>8</sub> /N <sub>2</sub> = 1 : 19                       | 0.5                        | 0.09                                                                                                      | 0.063                                | 8         |
| 7.5Cr/Al <sub>2</sub> O <sub>3</sub>               | 600            | C <sub>3</sub> H <sub>8</sub> /N <sub>2</sub> = 1 : 4                        | 2.2                        | 1.14                                                                                                      | 0.078                                | 9         |
| 10Cr/MCM-41                                        | 630            | C <sub>3</sub> H <sub>8</sub> /N <sub>2</sub> = 14 : 86                      | 1.1                        | 0.53                                                                                                      | 0.100                                | 10        |
| 2.5Cr-Ni/Al                                        | 550            | C <sub>3</sub> H <sub>8</sub> / Ar = 1 : 9                                   | 1.1                        | 0.42                                                                                                      | 0.110                                | 11        |
| Pt/Sn-ZSM-5                                        | 600            | C <sub>3</sub> H <sub>8</sub> /N <sub>2</sub> = 1.5 : 5                      | 1.8                        | 1.19                                                                                                      | 0.044                                | 12        |
| K-PtSn@MFI                                         | 600            | C <sub>3</sub> H <sub>8</sub> /N <sub>2</sub> = 24 : 76                      | 29.5                       | 0.001                                                                                                     | 0.013                                | 13        |
| Pt-Sn/SiO <sub>2</sub> -1073 K H <sub>2</sub>      | 500            | C <sub>3</sub> H <sub>8</sub> /N <sub>2</sub> = 20 : 80                      | 47.3                       | 12.12                                                                                                     | 0.013                                | 14        |
| 0.3Pt-0.5Zn@S-1                                    | 550            | C <sub>3</sub> H <sub>8</sub> /Ar = 19 : 11                                  | 6.5                        | 2.76                                                                                                      | 0.006                                | 15        |
| Pt/ND@G                                            | 600            | C <sub>3</sub> H <sub>8</sub> /Ar = 5 : 95                                   | 1.6                        | 0.22                                                                                                      | 0.020                                | 16        |
| Pt <sup>0</sup> Zn <sup>δ+</sup> /SiO <sub>2</sub> | 550            | C <sub>3</sub> H <sub>8</sub> /Ar = 20 : 80                                  | 32                         | 10.52                                                                                                     | 0.014                                | 17        |
| 0.04Pt-0.36Zn-DeBEA                                | 550            | C <sub>3</sub> H <sub>8</sub> /He = 10 : 30                                  | 59.1                       | 19.54                                                                                                     | 0.004                                | 18        |
| 15Zn0.1Pt                                          | 600            | C <sub>3</sub> H <sub>8</sub> /H <sub>2</sub> /N <sub>2</sub> = 1 : 1 : 8    | 3.0                        | 0.94                                                                                                      | 0.200                                | 1         |

Here the space time yield of propylene formation [STY(C<sub>3</sub>H<sub>6</sub>)] was calculated using the following equation:

$$STY(C_3H_6) = \frac{[C_3H_6] \times M_{C_3H_6}}{m_{cat} \times V_m}$$

Therein, [C<sub>3</sub>H<sub>6</sub>] is the flow rate of propylene at the outlet of reactor (mL h<sup>-1</sup>), M<sub>C<sub>3</sub>H<sub>6</sub></sub> is the molar weight of propylene (42 g mol<sup>-1</sup>). V<sub>m</sub> is molar volume (22400 mL mol<sup>-1</sup>), m<sub>cat</sub> is catalyst amount (g).

**Table S3.** Qualitative data of NH<sub>3</sub>-TPD measurements of *x*ZnO/SiO<sub>2</sub> with different ZnO size.

---

| Sample                 | Weak LAS area (a.u.) | Medium LAS area (a.u.) | Total area (a.u.) | Ratio of weak LASs (%) | Ratio of Medium LASs (%) |
|------------------------|----------------------|------------------------|-------------------|------------------------|--------------------------|
| 1ZnO/SiO <sub>2</sub>  | 130                  | 75                     | 205               | 63.4                   | 36.6                     |
| 3ZnO/SiO <sub>2</sub>  | 191                  | 134                    | 325               | 58.8                   | 41.2                     |
| 5ZnO/SiO <sub>2</sub>  | 216                  | 157                    | 373               | 57.9                   | 42.1                     |
| 7ZnO/SiO <sub>2</sub>  | 147                  | 115                    | 262               | 56.1                   | 43.9                     |
| 10ZnO/SiO <sub>2</sub> | 83                   | 75                     | 158               | 52.5                   | 47.5                     |
| ZnO-bulk               | 5.6                  | 0.6                    | 6.2               | 90.3                   | 9.7                      |

---

## References:

1. G. Liu, L. Zeng, Z.-J. Zhao, H. Tian, T. Wu, J. Gong, *ACS Catal.* 2016, **6**, 2158-2162.
2. S. Han, D. Zhao, T. Otroshchenko, H. Lund, U. Bentrup, V. A. Kondratenko, N. Rockstroh, S. Bartling, D. E. Doronkin, J.-D. Grunwaldt, U. Rodemerck, D. Linke, M. Gao, G. Jiang, E. V. Kondratenko, *ACS Catal.* 2020, **10**, 8933-8949.
3. C. Chen, Z. Hu, J. Ren, S. Zhang, Z. Wang, Z.-Y. Yuan, *ChemCatChem* 2019, **11**, 868-877.
4. M. Nadjafi, A. M. Kierzkowska, A. Armutlulu, R. Verel, A. Fedorov, P. M. Abdala, C. R. Müller, *J. Phys. Chem. C* 2021, **125**, 14065-14074.
5. C. Chen, Z.-P. Hu, J.-T. Ren, S. Zhang, Z. Wang, Z.-Y. Yuan, *Mol. Catal.* 2019, **476**, 110508.
6. D. Zhao, X. Tian, D. E. Doronkin, S. Han, V. A. Kondratenko, J.-D. Grunwaldt, A. Perehodjuk, T. H. Vuong, J. Rabeah, R. Eckelt, U. Rodemerck, D. Linke, G. Jiang, H. Jiao, E. V. Kondratenko, *Nature* 2021, **599**, 234-238.
7. Y. Qu, T. Zhao, H. Zhao, Z. Zhang, Z. Hao, *Appl. Surf. Sci.* 2022, **578**, 152067.
8. Z.-P. Hu, Z. Wang, Z.-Y. Yuan, *Mol. Catal.* 2020, **493**, 111052.
9. W.-Z. Lang, C.-L. Hu, L.-F. Chu, Y.-J. Guo, *RSC Advances* 2014, **4**, 37107-37113.
10. D. He, Y. Zhang, S. Yang, Y. Mei, Y. Luo, *ChemCatChem* 2018, **10**, 5434-5440.
11. P.-P. Li, W.-Z. Lang, K. Xia, L. Luan, X. Yan, Y.-J. Guo, *Appl. Catal. A Gen.* 2016, **522**, 172-179.
12. J. Zhu, R. Osuga, R. Ishikawa, N. Shibata, Y. Ikuhara, J. N. Kondo, M. Ogura, J. Yu, T. Wakihara, Z. Liu, T. Okubo, *Angew. Chem. Int. Ed.* 2020, **59**, 19669-19674.
13. L. Liu, M. Lopez-Haro, C. W. Lopes, S. Rojas-Buzo, P. Concepcion, R. Manzorro, L. Simonelli, A. Sattler, P. Serna, J. J. Calvino, A. Corma, *Nat. Catal.* 2020, **3**, 628-638.
14. L. Deng, H. Miura, T. Shishido, Z. Wang, S. Hosokawa, K. Teramura, T. Tanaka, *J. Catal.* 2018, **365**, 277-291.
15. Y. Wang, Z.-P. Hu, X. Lv, L. Chen, Z.-Y. Yuan, *J. Catal.* 2020, **385**, 61-69.
16. J. Liu, Y. Yue, H. Liu, Z. Da, C. Liu, A. Ma, J. Rong, D. Su, X. Bao, H. Zheng, *ACS Catal.* 2017, **7**, 3349-3355.
17. L. Rochlitz, K. Searles, J. Alfke, D. Zemlyanov, O. V. Safonova, C. Copéret, *Chem. Sci.* 2020, **11**, 1549-1555.
18. L. Qi, M. Babucci, Y. Zhang, A. Lund, L. Liu, J. Li, Y. Chen, A. S. Hoffman, S. R. Bare, Y. Han, *J. Am. Chem. Soc.* 2021, **143**, 21364-21378.
